# Supplementary material
Source: PubMed Central journal article supplement (PMC4832397)
Supplement: am5b12157_si_001.pdf [file am5b12157_si_001.pdf]

## Supporting Information

### Template-Stripped Multifunctional Wedge and Pyramid Arrays for Magnetic Nanofocusing and Optical Sensing

*Shailabh Kumar,<sup>1,2</sup> Timothy W. Johnson,<sup>1†</sup> Christopher K. Wood,<sup>3†</sup> Tao Qu,<sup>4†</sup>*

*Nathan J. Wittenberg,<sup>1</sup> Lauren M. Otto,<sup>1</sup> Jonah Shaver,<sup>1</sup> Nicholas J. Long,<sup>3</sup>*

*Randall H. Victora,<sup>1,4</sup> Joshua B. Edel,<sup>3</sup> Sang-Hyun Oh<sup>\*1,2</sup>*

<sup>1</sup>Department of Electrical and Computer Engineering, <sup>2</sup>Department of Biomedical Engineering,  
University of Minnesota, Minneapolis, Minnesota 55455, United States

<sup>3</sup>Department of Chemistry, Imperial College London, South Kensington,  
SW7 2AZ, London, United Kingdom

<sup>4</sup>Department of Physics, University of Minnesota, Minneapolis,  
Minnesota 55455, United States

<sup>†</sup>These authors contributed equally to this work.

Corresponding author \*E-mail: [sang@umn.edu](mailto:sang@umn.edu)

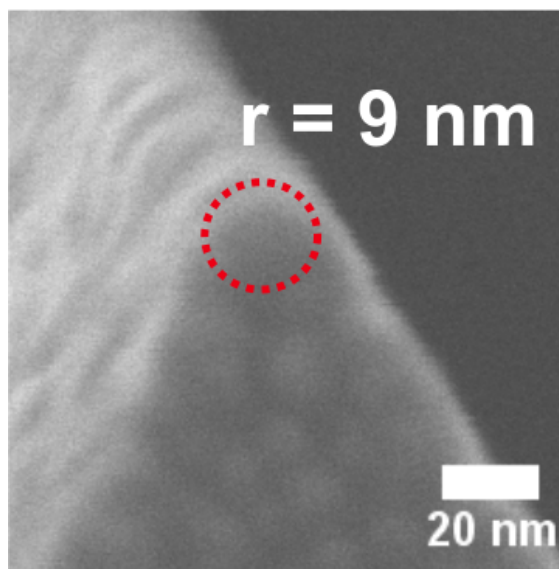

Figure S1: SEM image showing sharp tip of a wedge fabricated with deposited gold thickness 10 nm and nickel thickness 125 nm.

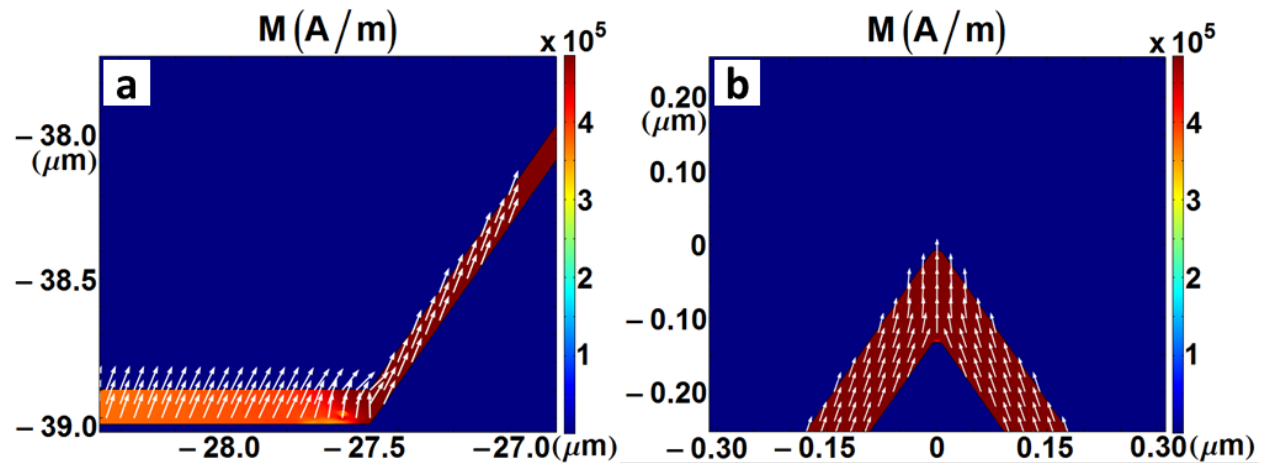

Figure S2: The magnetization of the nickel wedge (a) near the base and (b) near the tip. The saturation value of  $4.83 \times 10^5$  A/m was reached in the wedge region, although the direction of the magnetization is still somewhat in-plane due to shape anisotropy effects.

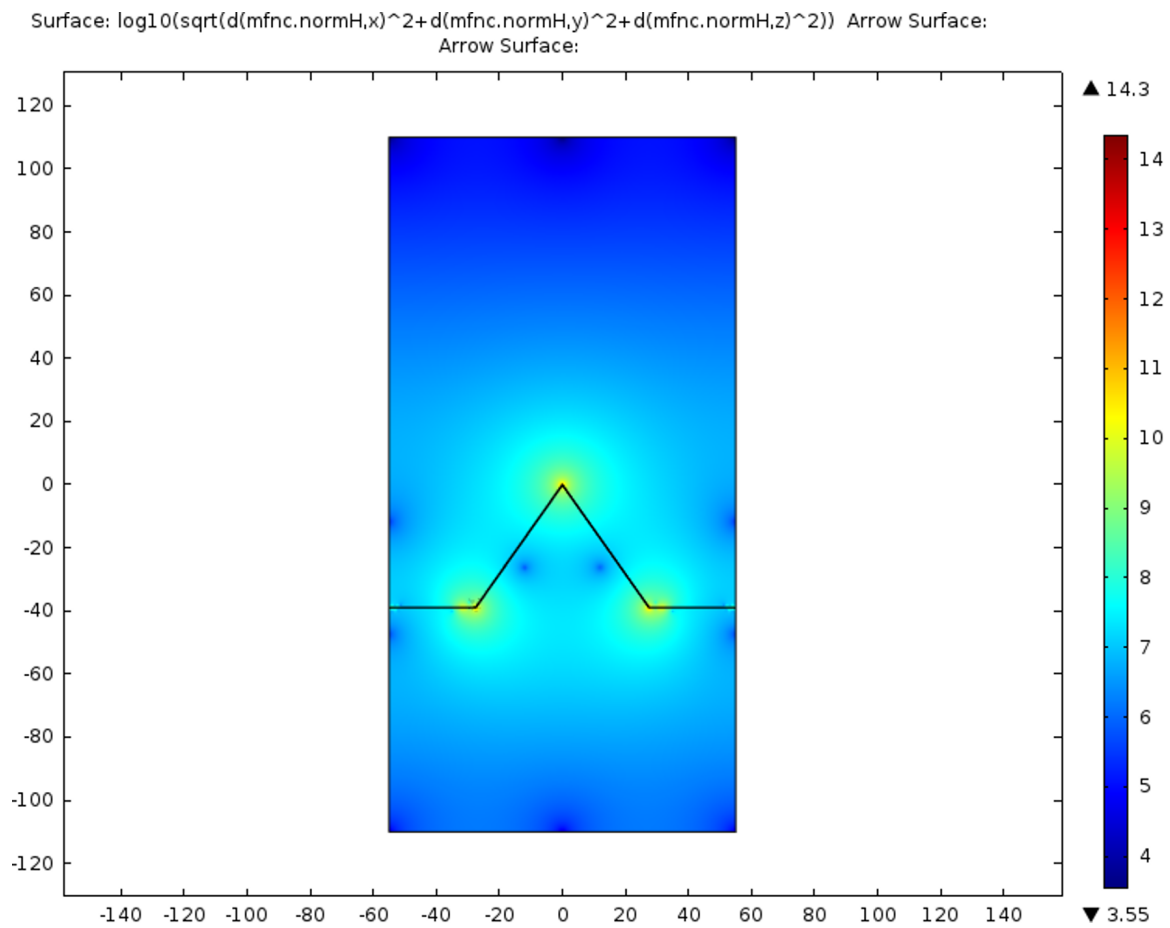

Figure S3: Order of magnitude plot of  $\nabla H$  for a wedge with 10 nm tip radius showing the entire modeled area.

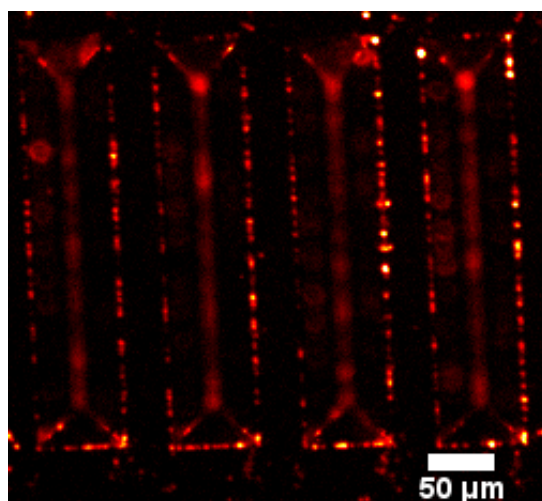

Figure S4: Fluorescence image showing 350 nm magnetic nanoparticles trapped along the sharp bases of magnetic wedges.
